# Supplementary material for: Effects of mineralocorticoid receptor antagonists in patients with preserved ejection fraction: a meta-analysis of randomized clinical trials
Source: Springer Nature journal article supplement (doi:10.1186/s12916-014-0261-8), 2015-01-16

# Figure S1

## A

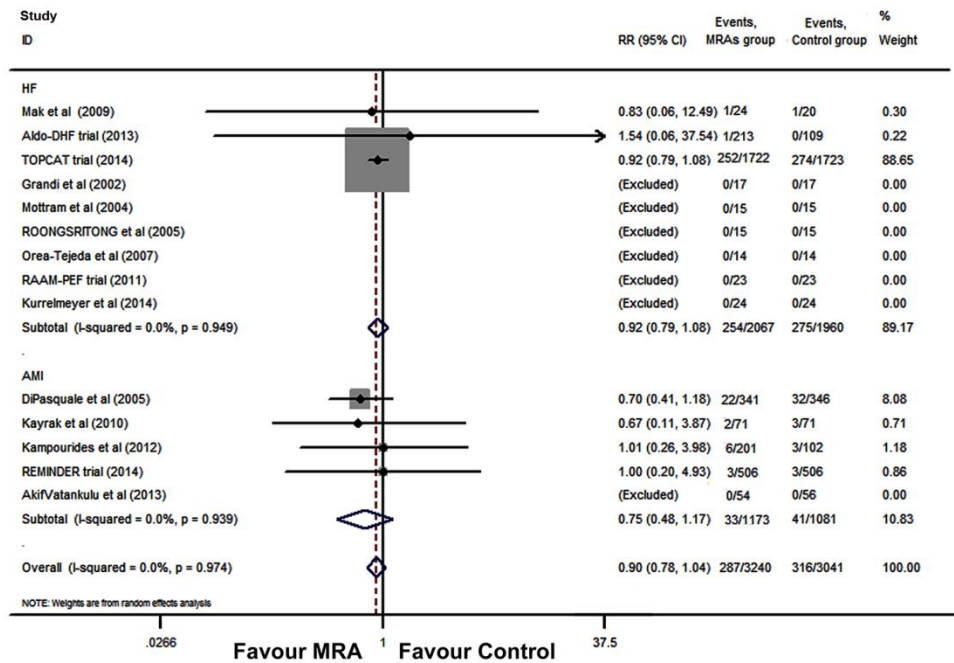

## B

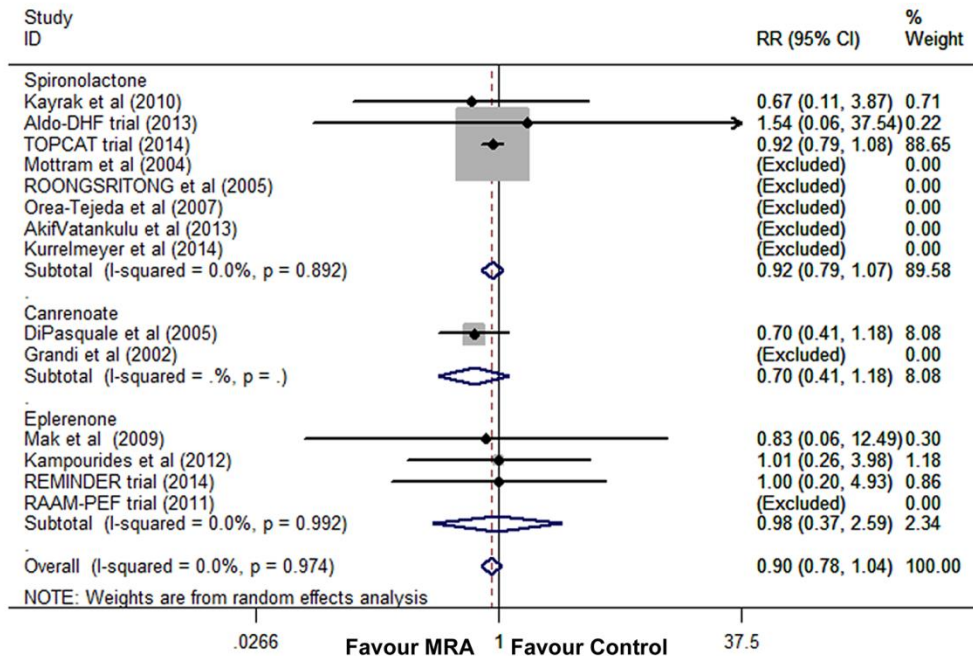

# Figure S1

**C**

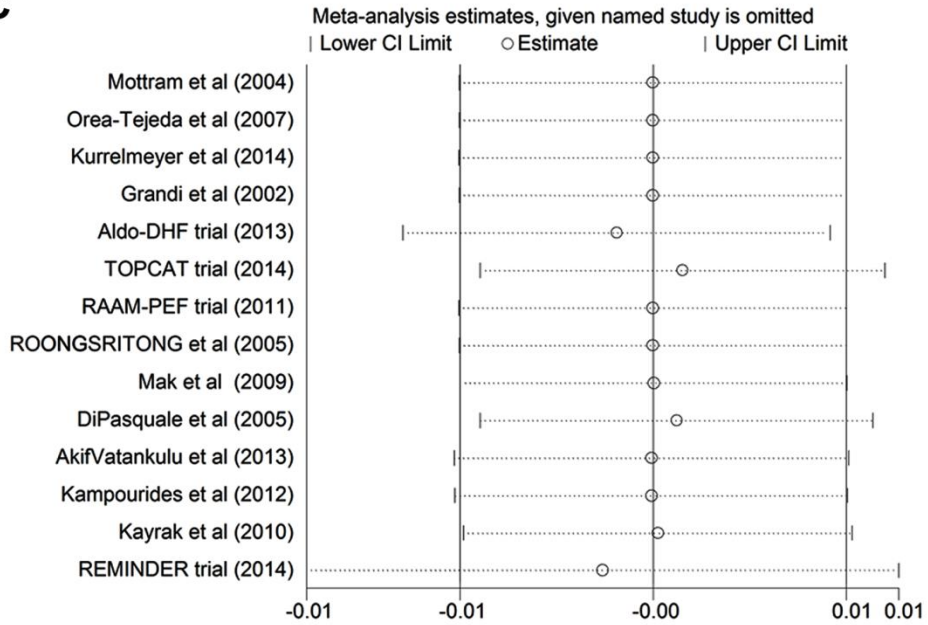

**D**

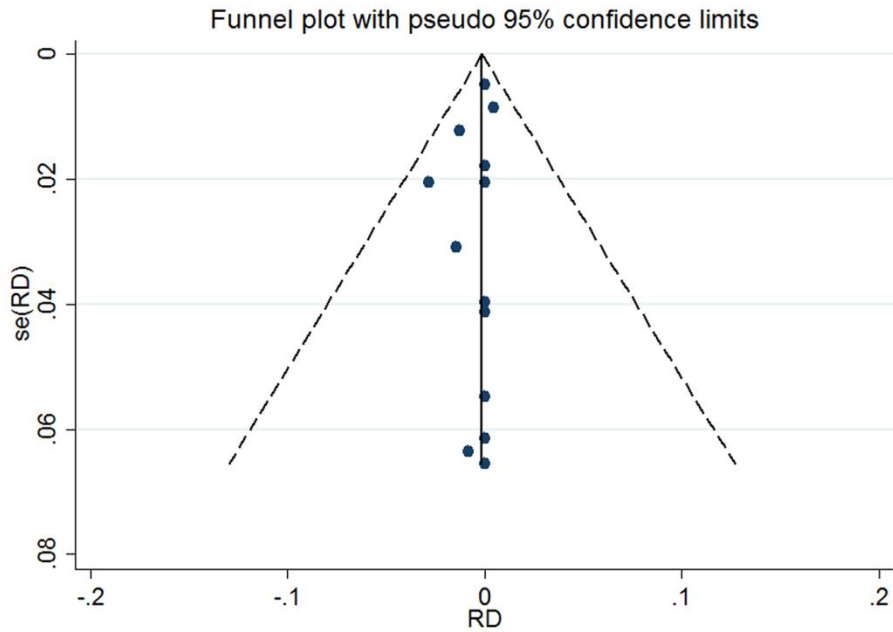

# Figure S2

## A

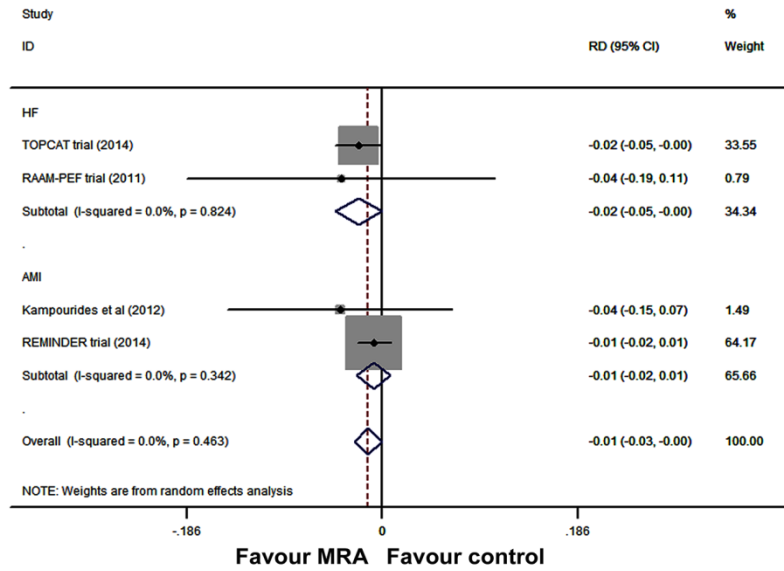

## B

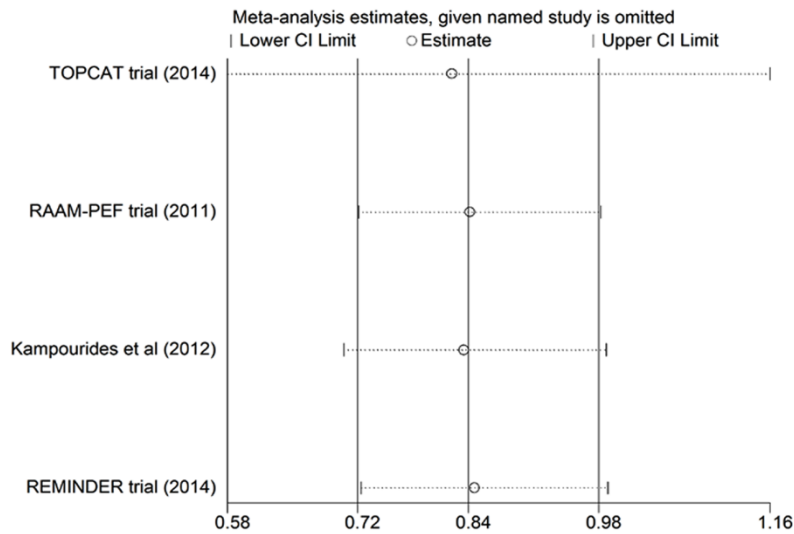

## C

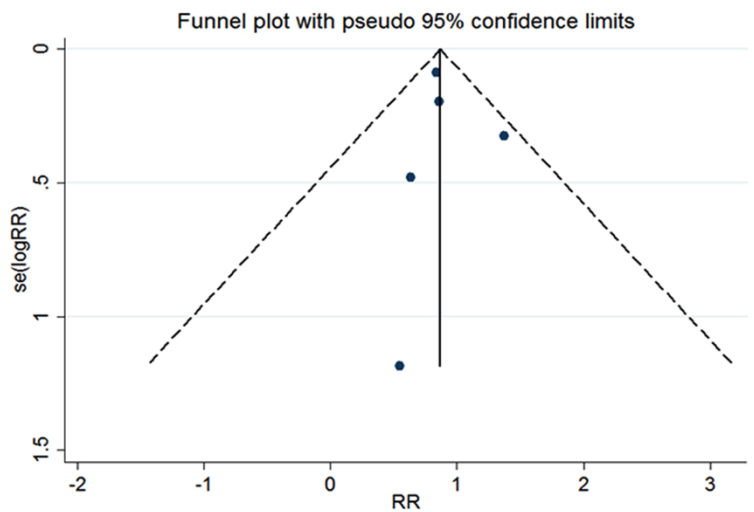

# Figure S3

**A**

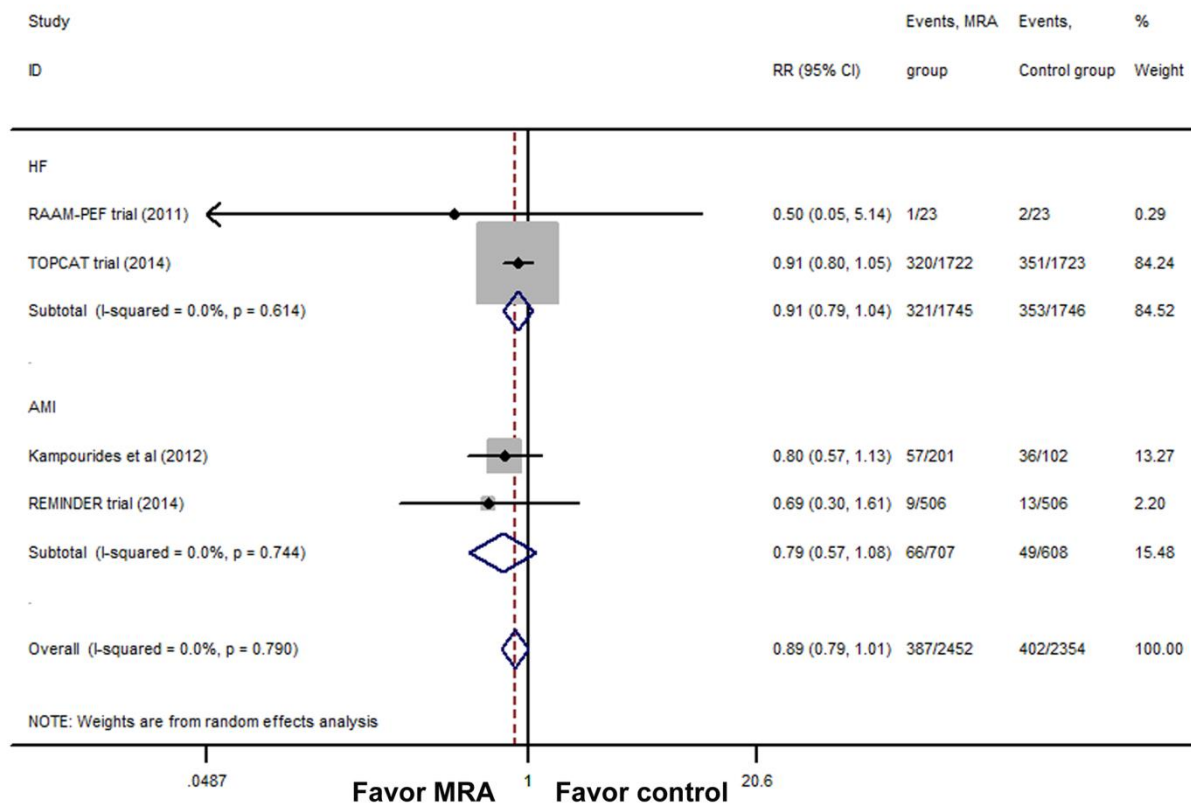

**B**

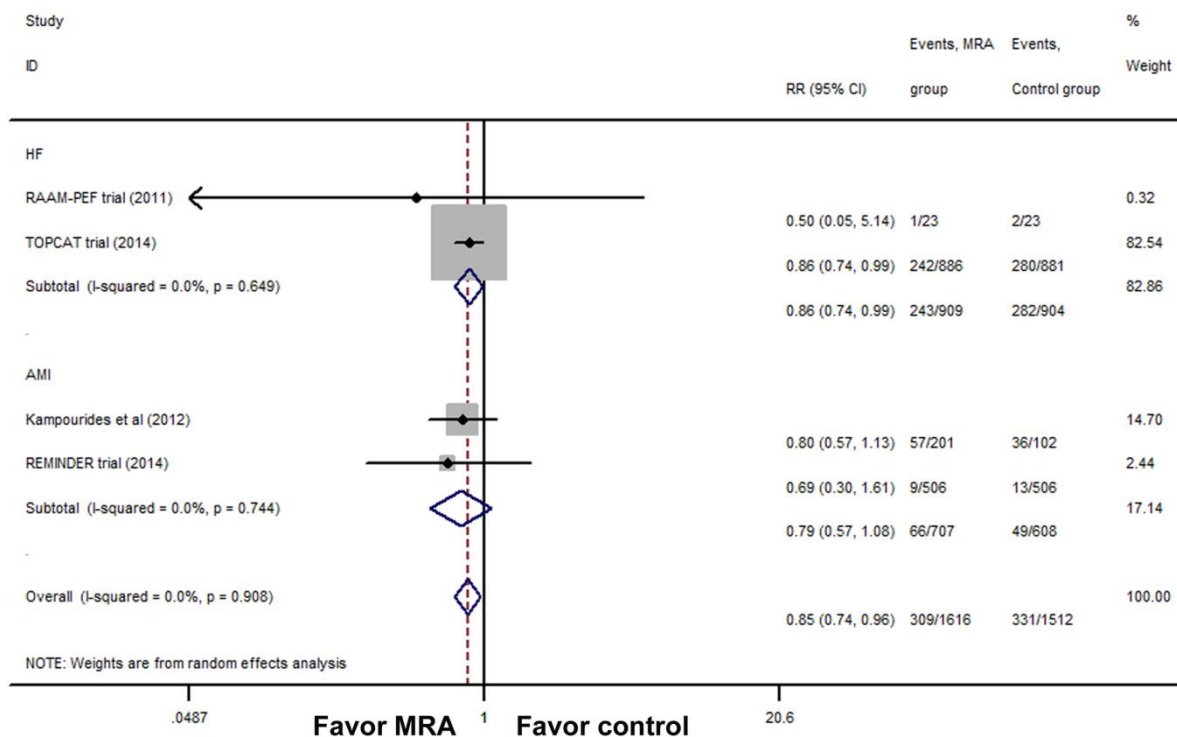

# Figure S4

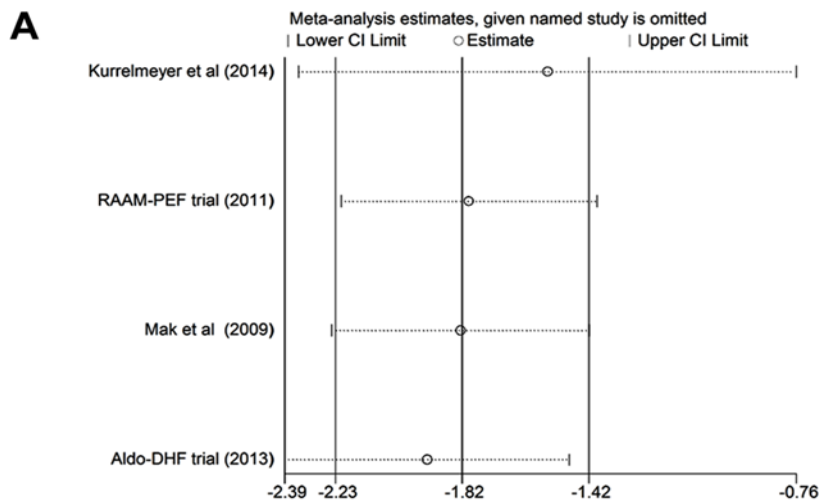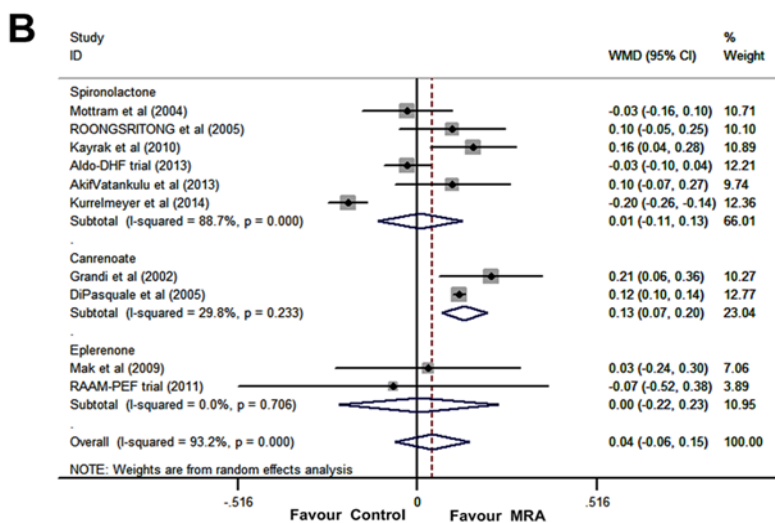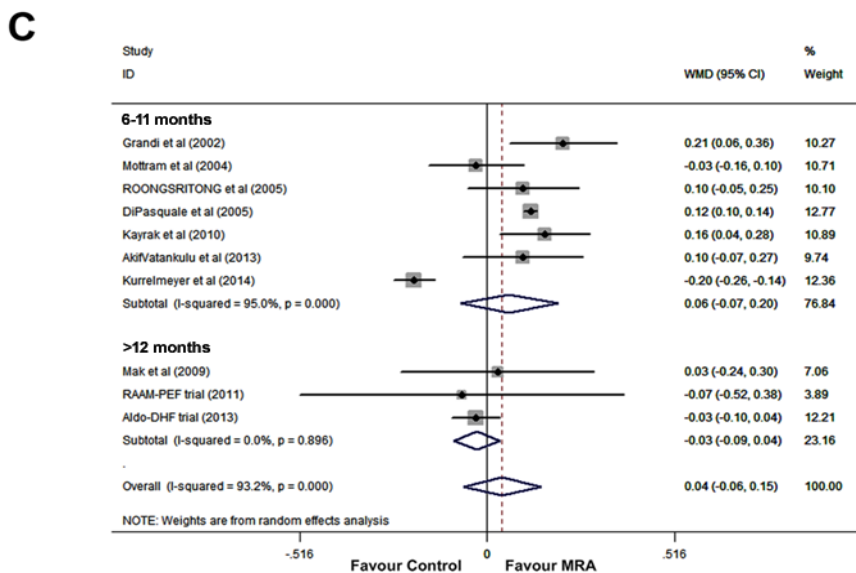

**Figure S5 A**

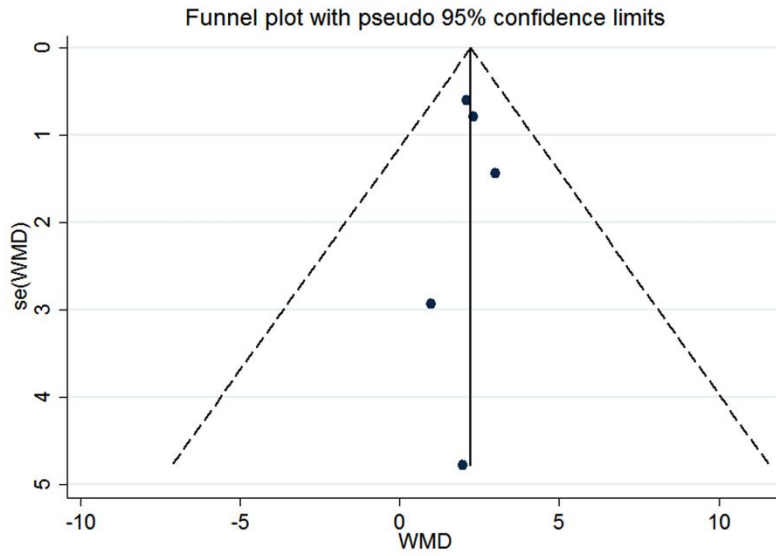

**B**

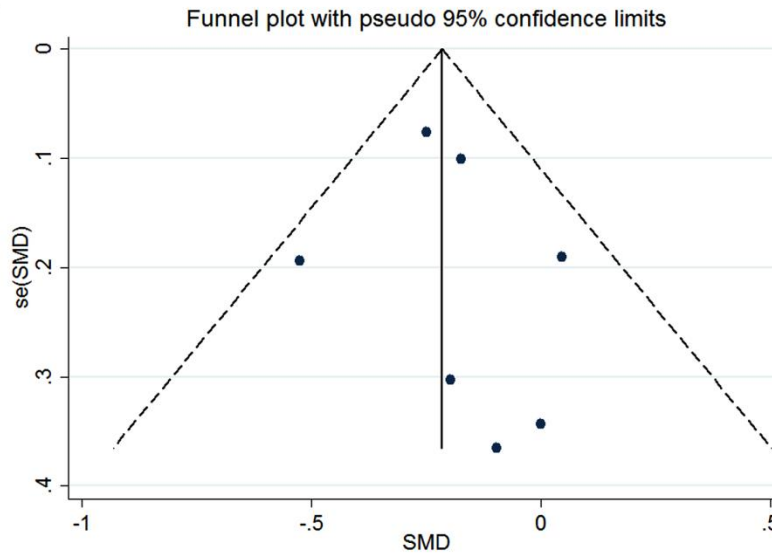

**C**

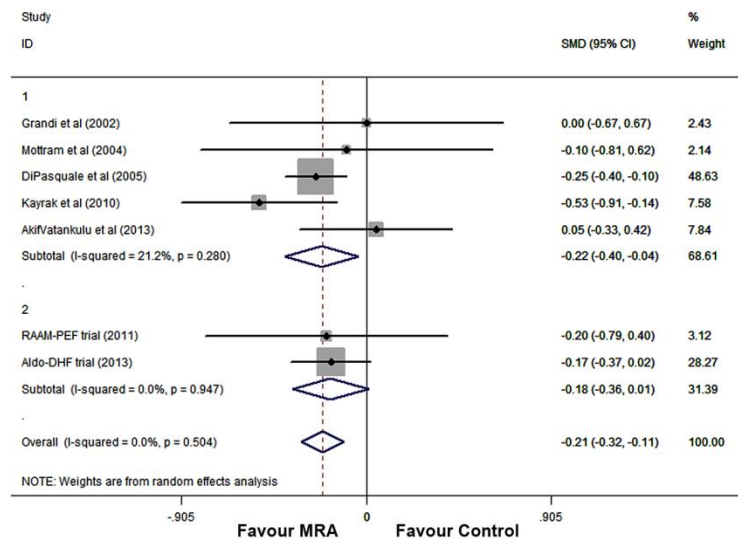

Supplement: MOESM4 [file 9758674]
